# Supplementary material for: Linking Assessment Questions to a Research Article to Stimulate Self-directed Learning and Develop High-order Cognitive Skills in an Undergraduate Module of Molecular Genetics
Source: Atypon-hosted journal article supplement (doi:10.1187/cbe.09-06-0040), 2009-12-01
Supplement: supp1.pdf [file supp1.pdf]

## List of supplementary reading

1. Xu J. 2005. The inheritance of organelle genes and genomes: patterns and mechanisms. *Genome*. 48(6):951-8.
2. Yu HG, Koshland D. 2005. Chromosome morphogenesis: condensin-dependent cohesin removal during meiosis. *Cell*. 23(3):397-407.
3. Schapira AH. 2006. Mitochondrial disease. *Lancet*. 368(9529):70-82.
4. Villasante A, Abad JP, Méndez-Lago M. 2007. Centromeres were derived from telomeres during the evolution of the eukaryotic chromosome. *Proc Natl Acad Sci USA* 104(25):10542-7.
5. Ikeda R, Kokubu C, Yusa K, Keng VW, Horie K, Takeda J. 2007. Sleeping beauty transposase has an affinity for heterochromatin conformation. *Mol Cell Biol*. 27(5):1665-76.
6. Hotopp JC, Clark ME, Oliveira DC, Foster JM, Fischer P, Torres MC, Giebel JD, Kumar N, Ishmael N, Wang S, Ingram J, Nene RV, Shepard J, Tomkins J, Richards S, Spiro DJ, Ghedin E, Slatko BE, Tettelin H, Werren JH. 2007. Widespread lateral gene transfer from intracellular bacteria to multicellular eukaryotes. *Science*. 317(5845):1753-6.
7. Dong G, Golden SS. 2008. How a cyanobacterium tells time. *Curr Opin Microbiol*. 11(6):541-6.
8. Eltsov M, Maclellan KM, Maeshima K, Frangakis AS, Dubochet J. 2008. Analysis of cryo-electron microscopy images does not support the existence of 30-nm chromatin fibers in mitotic chromosomes in situ. *Proc Natl Acad Sci U S A*. 105(50):19732-7.
