# Supplementary material for: Linking Assessment Questions to a Research Article to Stimulate Self-directed Learning and Develop High-order Cognitive Skills in an Undergraduate Module of Molecular Genetics
Source: Atypon-hosted journal article supplement (doi:10.1187/cbe.09-06-0040), 2009-12-01
Supplement: supp2.pdf [file supp2.pdf]

# Survey Form

## ASSESSING STUDENTS USING QUESTIONS LINKED TO A RESEARCH ARTICLE

Name/Matric No.(optional)\_\_\_\_\_ ; Email (optional) \_\_\_\_\_

I appreciate your comments. Your answer will NOT affect your scores/grades in this module and will be used for pedagogical research only.

❖ **Overall view about the CA, please circle one of followings.**

|               |          |          |          |               |
|---------------|----------|----------|----------|---------------|
| Very positive | Positive | Moderate | Negative | Very negative |
|---------------|----------|----------|----------|---------------|

❖ **Check the reasons for your above choice; multiple answers ok.**

1. CA is innovative, inspiring and motivating.
2. The scientific paper enhanced my learning interest, through unknown and controversial biological issues.
3. CA is much better than a memory-based exam.
4. The scientific paper extended my learning beyond the textbook.
5. CA measures students' understanding and encourages application and integration.
6. CA questions are well balanced, in term of application of the knowledge from the textbook and supplementary readings.
7. The scientific paper is too difficult and not suitable for first-year students.
8. CA questions are too specialized and its coverage is not good.
9. CA is ineffective in revealing students' understanding and evaluating my learning.
10. CA does not test my knowledge in Molecular Genetics, but tests my English comprehension.

❖ **Please contribute your own ideas:**

I prefer this type of CA, because:

I do not like this type of CA, because:

CA can be improved in following areas

❖ **Please contribute your own ideas:**

Your online feedback through IVLE is also greatly appreciated.
