# Supplementary material for: Linking Assessment Questions to a Research Article to Stimulate Self-directed Learning and Develop High-order Cognitive Skills in an Undergraduate Module of Molecular Genetics
Source: Atypon-hosted journal article supplement (doi:10.1187/cbe.09-06-0040), 2009-12-01
Supplement: supp3.pdf [file supp3.pdf]

## Survey Form

### Incorporating a Research Article into Tutorial Questions

Name/Matric No.(optional)\_\_\_\_\_; Email (optional) \_\_\_\_\_

I appreciate your feedback. Your answer will NOT affect your scores/grades in this module and will be used for pedagogical research only.

- ❖ **There are TEN research papers in the Supplementary Reading folder,**

| Question                                       | Number |
|------------------------------------------------|--------|
| How many papers have you downloaded?           |        |
| How many papers have you read through quickly? |        |
| How many papers have you read carefully?       |        |

- ❖ **Try to answer the following questions, which are linked to scientific articles.**

(Questions were deleted as they are the same with the CA questions)

- ❖ **To incorporate scientific papers into teaching, I am (circle your choice)**

|                   |         |              |               |       |
|-------------------|---------|--------------|---------------|-------|
| Very much engaged | engaged | uninterested | Disconcerting | bored |
|-------------------|---------|--------------|---------------|-------|

- ❖ **The reason for your above choice; multiple answers ok.**

- ❖ **Give your suggestions**

Your online feedback through IVLE is also greatly appreciated.
